# Supplementary material for: Evaluation of Knowledge, Attitudes, and Practices about Pharmacovigilance among Community Pharmacists in Qassim, Saudi Arabia
Source: MDPI journal article supplement (doi:10.3390/ijerph20043548), 2023-02-17
Supplement: s1 [file s1]

Pharmacists in Qassim, Saudi Arabia. **Survey**

**Instructions: We request your time and cooperation in completing this survey.**

| Knowledge and awareness of pharmacovigilance (PV) and adverse drug reactions (ADRs)                                                                       |                                                                                                                                                                                                                                                                                                                                                                                                                                                                                                                                |
|-----------------------------------------------------------------------------------------------------------------------------------------------------------|--------------------------------------------------------------------------------------------------------------------------------------------------------------------------------------------------------------------------------------------------------------------------------------------------------------------------------------------------------------------------------------------------------------------------------------------------------------------------------------------------------------------------------|
| <b>1. Which of the following BEST defines PV (WHO* definition)?</b><br><br><b>(Please select ONE answer only)</b><br><br>*WHO = World Health Organization | 1 <input type="checkbox"/> The science of monitoring ADRs happening in a Hospital.<br>2 <input type="checkbox"/> The process of improving the safety of drugs<br>3 <input type="checkbox"/> The science and activities of detecting, assessing, understanding & preventing adverse effects<br>4 <input type="checkbox"/> The science of detecting the type & incidence of ADRs after a drug is marketed.<br>5 <input type="checkbox"/> I do not know                                                                           |
| <b>2. The purpose of PV is:</b><br><br><b>(Please select ONE answer only)</b>                                                                             | 1 <input type="checkbox"/> To enhance patients' safety in relation to use of drugs<br>2 <input type="checkbox"/> To calculate incidence of ADRs<br>3 <input type="checkbox"/> To identify predisposing factors to ADRs<br>4 <input type="checkbox"/> To identify unrecognised ADRs<br>5 <input type="checkbox"/> I do not know                                                                                                                                                                                                 |
| <b>1. Which of the following defines ADRs correctly (WHO definition)?</b><br><br><b>(Please select ONE answer only)</b>                                   | 1 <input type="checkbox"/> Adverse health outcomes associated with inappropriate drug use<br>2 <input type="checkbox"/> Harm caused by drug overdose<br>3 <input type="checkbox"/> Harm resulting from the use of substandard/counterfeit drugs<br>4 <input type="checkbox"/> Any noxious or undesired effect of a drug occurring at normal doses, during normal use<br>5 <input type="checkbox"/> Adverse outcomes associated with drug impurity<br>6 <input type="checkbox"/> Other health problems associated with drug use |
| <b>2. Which of the following could be a common cause of ADRs?</b><br><i>(You may tick MORE THAN ONE)</i>                                                  | 1 <input type="checkbox"/> Undesirable effect<br>2 <input type="checkbox"/> Allergic reaction<br>3 <input type="checkbox"/> Incorrect administration<br>4 <input type="checkbox"/> Drug interaction<br>5 <input type="checkbox"/> Unsafe drug for the patient<br>6 <input type="checkbox"/> Dosage increased or decreased too fast<br>7 <input type="checkbox"/> Other (please specify) .....                                                                                                                                  |
| <b>3. In your opinion, which ADRs should be reported?</b><br><br><b>(Please select ONE answer only)</b>                                                   | 1 <input type="checkbox"/> All serious ADRs<br>2 <input type="checkbox"/> ADRs to herbal and non-allopathic drugs<br>3 <input type="checkbox"/> ADRs to new drugs<br>4 <input type="checkbox"/> ADRs to vaccines                                                                                                                                                                                                                                                                                                               |

|                                                                                                                                       |                                                                                                                                                                                                                                                                                                                                                                                   |
|---------------------------------------------------------------------------------------------------------------------------------------|-----------------------------------------------------------------------------------------------------------------------------------------------------------------------------------------------------------------------------------------------------------------------------------------------------------------------------------------------------------------------------------|
|                                                                                                                                       | 5 <input type="checkbox"/> Unknown ADRs to old drugs    6 <input type="checkbox"/> All of the above<br>7 <input type="checkbox"/> None of the above                                                                                                                                                                                                                               |
| 4. Are ADRs classified as drug therapy problems (DTP)?                                                                                | 1 <input type="checkbox"/> Yes                      2 <input type="checkbox"/> No                      3 <input type="checkbox"/> I do not know                                                                                                                                                                                                                                   |
| 5. In your opinion, which of these are qualified to report ADRs?<br>(You may tick MORE THAN ONE)                                      | 1 <input type="checkbox"/> Doctors                      2 <input type="checkbox"/> Nurses                      3 <input type="checkbox"/> Pharmacists<br>4 <input type="checkbox"/> Dentists                      5 <input type="checkbox"/> Physiotherapists                      6 <input type="checkbox"/> Patients<br>7 <input type="checkbox"/> Other (please specify) ..... |
| 6. Have you heard of the following medication safety processes?<br>(You may tick MORE THAN ONE)                                       | 1 <input type="checkbox"/> Medication reconciliation<br>2 <input type="checkbox"/> Medication check review<br>3 <input type="checkbox"/> Medication history<br>4 <input type="checkbox"/> I don't know                                                                                                                                                                            |
| 7. Are you aware of organizations that educate healthcare professionals on safe medication practices?<br>(You may tick MORE THAN ONE) | 1 <input type="checkbox"/> Institute For Safe Medication Practices<br>2 <input type="checkbox"/> International Medication Safety Network<br>3 <input type="checkbox"/> Canadian Patient Safety Institute<br>4 <input type="checkbox"/> World Health Organization (WHO)<br>5 <input type="checkbox"/> Other: .....<br>6 <input type="checkbox"/> I don't know                      |
| 8. Are you aware of any Center or ADR reporting system in Saudi Arabia?                                                               | 1 <input type="checkbox"/> Yes                      2 <input type="checkbox"/> No                      3 <input type="checkbox"/> I do not know<br>If YES, where? .....                                                                                                                                                                                                           |
| 9. Which method would you prefer to send ADR information to an ADR Reporting Center?<br><br>(Please select ONE answer only)           | 1 <input type="checkbox"/> Direct contact                      2 <input type="checkbox"/> Post                      3 <input type="checkbox"/> Telephone<br>4 <input type="checkbox"/> Email/on Website                      5 <input type="checkbox"/> Other (please specify) .....                                                                                              |
| <b>Perception and attitude towards PV and ADRs reporting</b>                                                                          |                                                                                                                                                                                                                                                                                                                                                                                   |
| 10. In your opinion, do you think it is necessary to report ADRs?                                                                     | 1 <input type="checkbox"/> Yes                      2 <input type="checkbox"/> No                      3 <input type="checkbox"/> I do not know                                                                                                                                                                                                                                   |
| 11. In your opinion, is ADR reporting a professional obligation?                                                                      | 1 <input type="checkbox"/> Yes                      2 <input type="checkbox"/> No                      3 <input type="checkbox"/> I do not know                                                                                                                                                                                                                                   |
| 12. Do you think that ADR reporting will affect healthcare system in a positive way?                                                  | 1 <input type="checkbox"/> Yes                      2 <input type="checkbox"/> No                      3 <input type="checkbox"/> I do not know                                                                                                                                                                                                                                   |

|                                                                                                             |                                                                                                                                                                                                                                                                                                                                                                                                                                               |                               |                                          |
|-------------------------------------------------------------------------------------------------------------|-----------------------------------------------------------------------------------------------------------------------------------------------------------------------------------------------------------------------------------------------------------------------------------------------------------------------------------------------------------------------------------------------------------------------------------------------|-------------------------------|------------------------------------------|
| 13. In your opinion, do you think that conducting a medication review can prevent ADRs?                     | 1 <input type="checkbox"/> Yes                                                                                                                                                                                                                                                                                                                                                                                                                | 2 <input type="checkbox"/> No | 3 <input type="checkbox"/> I do not know |
| 14. Should ADR reporting and PV be taught in detail to healthcare professionals?                            | 1 <input type="checkbox"/> Yes                                                                                                                                                                                                                                                                                                                                                                                                                | 2 <input type="checkbox"/> No | 3 <input type="checkbox"/> I do not know |
| 15. Are you willing to implement ADR reporting in your practice?                                            | 1 <input type="checkbox"/> Yes                                                                                                                                                                                                                                                                                                                                                                                                                | 2 <input type="checkbox"/> No | 3 <input type="checkbox"/> I do not know |
| <b>Practices and barriers of ADR identification and reporting</b>                                           |                                                                                                                                                                                                                                                                                                                                                                                                                                               |                               |                                          |
| 16. Have you ever conducted a medication review with your patients?                                         | 1 <input type="checkbox"/> Yes 2 <input type="checkbox"/> No<br><b>If YES, at which frequency? (Please choose ONE):</b><br>1 <input type="checkbox"/> rarely    2 <input type="checkbox"/> occasionally    3 <input type="checkbox"/> often    4 <input type="checkbox"/> always                                                                                                                                                              |                               |                                          |
| 17. What are the barriers to conducting a medication review?<br><i>(You may tick MORE THAN ONE)</i>         | 1 <input type="checkbox"/> Lack of time<br>2 <input type="checkbox"/> Lack of training on how to conduct a medication review<br>3 <input type="checkbox"/> Lack of a formal process in place<br>4 <input type="checkbox"/> Communication (language barrier) difficulties with the patients<br>5 <input type="checkbox"/> Lack of knowledge by the patients about their medications<br>6 <input type="checkbox"/> Other (please specify) ..... |                               |                                          |
| 18. Have you ever identified an ADR in any patient?                                                         | 1 <input type="checkbox"/> Yes 2 <input type="checkbox"/> No<br><b>If YES, how many till date? (Please choose ONE):</b><br>1 <input type="checkbox"/> <5 times    2 <input type="checkbox"/> 5-10 times    3 <input type="checkbox"/> >10 times                                                                                                                                                                                               |                               |                                          |
| 19. Have you ever reported an ADR?                                                                          | 1 <input type="checkbox"/> Yes 2 <input type="checkbox"/> No<br><b>If YES, on what medications? .....</b>                                                                                                                                                                                                                                                                                                                                     |                               |                                          |
| 20. Do you know to whom ADR should be reported?<br><i>(You may tick MORE THAN ONE)</i>                      | 1 <input type="checkbox"/> The Ministry of health (MOH)<br>2 <input type="checkbox"/> Saudi Drug and Food Control Administration<br>3 <input type="checkbox"/> Drug Company<br>4 <input type="checkbox"/> My hospital or clinic<br>5 <input type="checkbox"/> Other (please specify) .....<br>6 <input type="checkbox"/> I do not know                                                                                                        |                               |                                          |
| 21. What factors do you think may be discouraging of reporting ADRs?<br><i>(You may tick MORE THAN ONE)</i> | 1 <input type="checkbox"/> Not knowing how to report<br>2 <input type="checkbox"/> Not knowing what information to report<br>3 <input type="checkbox"/> Thinking it is not important to report an ADR incident<br>4 <input type="checkbox"/> Managing patients is more important than reporting ADR<br>5 <input type="checkbox"/> It is not part of my job to report ADRs                                                                     |                               |                                          |

|                                                                                                                                                                                                                                                          |                                                                                                                                                                                                               |
|----------------------------------------------------------------------------------------------------------------------------------------------------------------------------------------------------------------------------------------------------------|---------------------------------------------------------------------------------------------------------------------------------------------------------------------------------------------------------------|
|                                                                                                                                                                                                                                                          | 6 <input type="checkbox"/> Patient confidentiality issues<br>7 <input type="checkbox"/> Other (please specify) .....                                                                                          |
| 22. Are ADRs being reported as part of "incident reports" in your institution?                                                                                                                                                                           | 1 <input type="checkbox"/> Yes                      2 <input type="checkbox"/> No                      3 <input type="checkbox"/> I do not know<br>If YES, <u>what do you do with these reports?</u><br>..... |
| 23. What do you think are the barriers for Saudi Arabia to have a formal PV Center (as opposed to the Gulf Countries)?<br>.....                                                                                                                          |                                                                                                                                                                                                               |
| 24. Any suggestions/comments you would like to provide?<br>.....                                                                                                                                                                                         |                                                                                                                                                                                                               |
| <b>Demographics</b>                                                                                                                                                                                                                                      |                                                                                                                                                                                                               |
| 25. Age .....years                                                                                                                                                                                                                                       |                                                                                                                                                                                                               |
| 26. Gender            1 <input type="checkbox"/> Male                                      2 <input type="checkbox"/> Female                                                                                                                             |                                                                                                                                                                                                               |
| 27. Nationality      1 <input type="checkbox"/> Saudi                                      2 <input type="checkbox"/> Non-Saudi (Please specify).....                                                                                                    |                                                                                                                                                                                                               |
| 28. What is your rank of employment? (Please choose ONE)                                                                                                                                                                                                 |                                                                                                                                                                                                               |
| 1 <input type="checkbox"/> Beginner Pharmacist (صيدلي مبتدئ)                                                                                                                                                                                             | 2 <input type="checkbox"/> Pharmacist (صيدلي)                                                                                                                                                                 |
| 3 <input type="checkbox"/> Senior Pharmacist (صيدلي أول)                                                                                                                                                                                                 | 4 <input type="checkbox"/> Pharmacy Specialist (اختصاصي)                                                                                                                                                      |
| 5 <input type="checkbox"/> Senior Pharmacy Specialist (اختصاصي أول صيدلة)                                                                                                                                                                                | 6 <input type="checkbox"/> Head of Pharmacy Specialist (رئيس اختصاصيين)                                                                                                                                       |
| What is your <u>LAST</u> degree in pharmacy?                                                                                                                                                                                                             |                                                                                                                                                                                                               |
| 1 <input type="checkbox"/> Bachelor            2 <input type="checkbox"/> Pharm D                      3 <input type="checkbox"/> Master                      4 <input type="checkbox"/> PhD                      5 <input type="checkbox"/> Other ..... |                                                                                                                                                                                                               |
| 29. Country of graduation: .....                                                                                                                                                                                                                         |                                                                                                                                                                                                               |
| 30. Practice years .....(years)                                                                                                                                                                                                                          |                                                                                                                                                                                                               |
| 31. Location:.....                                                                                                                                                                                                                                       |                                                                                                                                                                                                               |

Thank you for your cooperation
